# Supplementary material for: Compared Block Periodized and Non-Periodized Physical Activity Programs in Older Adults
Source: MDPI journal article supplement (doi:10.3390/sports12050119), 2024-04-28
Supplement: s1 [file s1]

**Content**

- 1. eTable 1. Baseline and results of Experimental Group under 75 years .....2
- 2. eTable 2. Baseline and results of Control Group under 75 years .....3
- 3. eTable 3. Baseline and results of Experimental Group between 75-85 years .....4
- 4. eTable 4. Baseline and results of Control Group between 75-85 years .....5
- 5. eTable 5. Baseline and results of Experimental Group over 85 years .....6
- 6. eTable 6. Baseline and results of Control Group over 85 years.....7

**eTable 1. Baseline and results of Experimental Group under 75 years**

| <b>Experimental Group &lt;75 years</b> | <b>Baseline (N=12)</b> | <b>Session 86 (N=12)</b> | <b>p-value</b> |
|----------------------------------------|------------------------|--------------------------|----------------|
| <b>Characteristics</b>                 |                        |                          |                |
| <b>% Women</b>                         | 33,3%                  |                          |                |
| <b>Age average</b>                     | 71,83 (,737)           |                          |                |
| <b>Anthropometric</b>                  |                        |                          |                |
| <b>Weight</b>                          | 65,7333 (4,27337)      | 64,3333 (4,58863)        | ,054           |
| <b>Height</b>                          | 151,1000 (2,49663)     |                          |                |
| <b>BMI</b>                             | 28,5633 (1,39803)      | 27,9453 (1,58093)        | ,041*          |
| <b>% Body Fat</b>                      | 44,111 (1,2988)        | 43,678 (1,2770)          | ,463           |
| <b>Fat weight</b>                      | 28,856 (1,7841)        | 28,433 (1,6898)          | ,208           |
| <b>Functional Test</b>                 |                        |                          |                |
| <b>Tandem</b>                          | 8,8438 (,78422)        | 8,2675 (1,11670)         | ,273           |
| <b>4m Walking</b>                      | 4,4513 (,20566)        | 4,6975 (,10001)          | ,754           |
| <b>Strong leg</b>                      | 9,7763 (,72894)        | 9,2613 (,89642)          | ,272           |
| <b>Handgrip Right</b>                  | 19,0250 (1,35419)      | 19,4750 (2,50704)        | ,965           |
| <b>Handgrip Left</b>                   | 20,7125 (3,73270)      | 20,0125 (2,50866)        | ,575           |
| <b>Up &amp; Go</b>                     | 76,1250 (5,17700)      | 80,8750 (5,34335)        | ,061           |
| <b>2' Step</b>                         | 8,4275 (,51695)        | 7,8013 (,33642)          | ,695           |

**eTable 2. Baseline and results of Control Group under 75 years**

| Control Group <75 years | Baseline (N=28)    | Session 86 (N=28) | p-value |
|-------------------------|--------------------|-------------------|---------|
| <b>Characteristics</b>  |                    |                   |         |
| % Women                 | 85,7%              |                   |         |
| Age average             | 71,00 (,491)       |                   |         |
| <b>Anthropometric</b>   |                    |                   |         |
| Weight                  | 65,7333 (4,27337)  | 68,1481 (1,81220) | ,18     |
| Height                  | 151,1000 (2,49663) |                   |         |
| BMI                     | 28,5633 (1,39803)  | 29,4940 (,76992)  | ,017*   |
| % Body Fat              | 44,111 (1,2988)    | 43,500 (,7068)    | ,409    |
| Fat weight              | 28,856 (1,7841)    | 29,807 (1,0847)   | ,027*   |
| <b>Functional Test</b>  |                    |                   |         |
| Tandem                  | 8,8438 (,78422)    | 8,6513 (1,23975)  | ,050*   |
| 4m Walking              | 4,4513 (,20566)    | 4,2571 (,15881)   | ,428    |
| Strong leg              | 9,7763 (,72894)    | 10,3714 (,72590)  | ,333    |
| Handgrip Right          | 19,0250 (1,35419)  | 19,4429 (1,13756) | ,882    |
| Handgrip Left           | 20,7125 (3,73270)  | 19,2214 (,90628)  | ,665    |
| Up & Go                 | 76,1250 (5,17700)  | 83,1429 (2,17846) | ,638    |
| 2' Step                 | 8,4275 (,51695)    | 7,6657 (,23104)   | ,005*   |

**eTable 3. Baseline and results of Experimental Group between 75-85 years**

| <b>Experimental Group 75-85 years</b> | <b>Baseline (N=43)</b> | <b>Session 86 (N=43)</b> | <b>p-value</b> |
|---------------------------------------|------------------------|--------------------------|----------------|
| <b>Characteristics</b>                |                        |                          |                |
| <b>% Women</b>                        | 65,1%                  |                          |                |
| <b>Age average</b>                    | 78,86 (,419)           |                          |                |
| <b>Antrhopometric</b>                 |                        |                          |                |
| <b>Weight</b>                         | 68,0049 (1,73899)      | 67,6610 (1,72644)        | ,180           |
| <b>Height</b>                         | 153,7930 (,98593)      |                          |                |
| <b>BMI</b>                            | 28,5212 (,55330)       | 28,3821 (,55648)         | ,180           |
| <b>% Body Fat</b>                     | 42,641 (,7539)         | 43,071 (,7056)           | ,083           |
| <b>Fat weight</b>                     | 28,976 (,8803)         | 29,051 (,8937)           | ,706           |
| <b>Functional Test</b>                |                        |                          |                |
| <b>Tandem</b>                         | 9,5789 (,42105)        | 9,7158 (,17494)          | ,875           |
| <b>4m Walking</b>                     | 4,0537 (,23328)        | 4,1632 (,18536)          | ,244           |
| <b>Strong leg</b>                     | 9,7205 (,56642)        | 9,6121 (,55192)          | ,894           |
| <b>Handgrip Right</b>                 | 21,1011 (1,20604)      | 22,2632 (1,44064)        | ,346           |
| <b>Handgrip Left</b>                  | 20,5684 (1,34582)      | 21,2175 (1,50248)        | ,293           |
| <b>Up &amp; Go</b>                    | 82,6842 (5,35306)      | 79,7895 (5,46952)        | ,020*          |
| <b>2' Step</b>                        | 8,5226 (,44443)        | 7,4805 (,31243)          | ,645           |

**eTable 4. Baseline and results of Control Group between 75-85 years**

| Control Group 75-85 years | Baseline (N=31)   | Session 86 (N=31) | p-value |
|---------------------------|-------------------|-------------------|---------|
| <b>Characteristics</b>    |                   |                   |         |
| % Women                   | 74,2%             |                   |         |
| Age average               | 78,77 (,470)      |                   |         |
| <b>Anthropometric</b>     |                   |                   |         |
| Weight                    | 68,0049 (1,73899) | 68,2708 (2,07796) | ,012*   |
| Height                    | 153,7930 (,98593) |                   |         |
| BMI                       | 28,5212 (,55330)  | 29,1837 (,81803)  | ,041*   |
| % Body Fat                | 42,641 (,7539)    | 42,763 (1,2878)   | ,403    |
| Fat weight                | 28,976 (,8803)    | 29,213 (1,2919)   | ,072    |
| <b>Functional Test</b>    |                   |                   |         |
| Tandem                    | 9,5789 (,42105)   | 8,0481 (,72464)   | ,638    |
| 4m Walking                | 4,0537 (,23328)   | 4,0781 (,14719)   | ,427    |
| Strong leg                | 9,7205 (,56642)   | 10,4895 (,37667)  | ,192    |
| Handgrip Right            | 21,1011 (1,20604) | 20,3524 (,76577)  | ,171    |
| Handgrip Left             | 20,5684 (1,34582) | 20,5810 (,78415)  | ,717    |
| Up & Go                   | 82,6842 (5,35306) | 81,6667 (4,50256) | ,784    |
| 2' Step                   | 8,5226 (,44443)   | 8,0914 (,28293)   | ,000*   |

**eTable 5. Baseline and results of Experimental Group over 85 years**

| <b>Experimental Group &gt;85 years</b> | <b>Baseline (N=11)</b> | <b>Session 86 (N=11)</b> | <b>p-value</b> |
|----------------------------------------|------------------------|--------------------------|----------------|
| <b>Characteristics</b>                 |                        |                          |                |
| <b>% Women</b>                         | 54,5%                  |                          |                |
| <b>Age average</b>                     | 87,64 (,801)           |                          |                |
| <b>Antrhopometric</b>                  |                        |                          |                |
| <b>Weight</b>                          | 59,4091 (2,59003)      | 58,4364 (2,63222)        | ,038*          |
| <b>Height</b>                          | 151,5636 (2,03641)     |                          |                |
| <b>BMI</b>                             | 25,8203 (,85590)       | 25,3855 (,86343)         | ,038*          |
| <b>% Body Fat</b>                      | 44,091 (1,1935)        | 44,018 (1,3127)          | ,756           |
| <b>Fat weight</b>                      | 26,473 (1,0890)        | 25,536 (1,2181)          | ,016*          |
| <b>Functional Test</b>                 |                        |                          |                |
| <b>Tandem</b>                          | 8,8533 (1,14667)       | 7,6550 (1,48311)         | ,068           |
| <b>4m Walking</b>                      | 5,5467 (,93106)        | 5,4567 (,87487)          | ,213           |
| <b>Strong leg</b>                      | 10,5050 (2,74410)      | 10,6950 (1,42325)        | ,203           |
| <b>Handgrip Right</b>                  | 19,2833 (2,93841)      | 18,5333 (1,39968)        | ,075           |
| <b>Handgrip Left</b>                   | 17,7000 (1,65630)      | 18,8833 (1,21392)        | ,041*          |
| <b>Up &amp; Go</b>                     | 67,3333 (14,14842)     | 80,8333 (5,37536)        | ,028*          |
| <b>2' Step</b>                         | 11,8567 (1,59458)      | 10,0217 (1,66375)        | ,540           |

**eTable 6. Baseline and results of Control Group over 85 years**

| <b>Control Group &gt;85 years</b> | <b>Baseline (N=12)</b> | <b>Session 86 (N=12)</b> | <b>p-value</b> |
|-----------------------------------|------------------------|--------------------------|----------------|
| <b>Characteristics</b>            |                        |                          |                |
| <b>% Women</b>                    | 83,3%                  |                          |                |
| <b>Age average</b>                | 86,08 (,313)           |                          |                |
| <b>Anthropometric</b>             |                        |                          |                |
| <b>Weight</b>                     | 59,4091 (2,59003)      | 61,6364 (2,99628)        | ,021*          |
| <b>Height</b>                     | 151,5636 (2,03641)     |                          |                |
| <b>BMI</b>                        | 25,8203 (,85590)       | 26,6227 (1,21648)        | ,028*          |
| <b>% Body Fat</b>                 | 44,091 (1,1935)        | 43,827 (1,4983)          | ,593           |
| <b>Fat weight</b>                 | 26,473 (1,0890)        | 27,127 (1,8607)          | ,423           |
| <b>Functional Test</b>            |                        |                          |                |
| <b>Tandem</b>                     | 8,8533 (1,14667)       | 9,0100 (,69932)          | ,674           |
| <b>4m Walking</b>                 | 5,5467 (,93106)        | 4,9338 (,26390)          | ,084           |
| <b>Strong leg</b>                 | 10,5050 (2,74410)      | 11,3338 (,87792)         | ,638           |
| <b>Handgrip Right</b>             | 19,2833 (2,93841)      | 18,3125 (1,30267)        | ,410           |
| <b>Handgrip Left</b>              | 17,7000 (1,65630)      | 19,4500 (1,05526)        | ,388           |
| <b>Up &amp; Go</b>                | 67,3333 (14,14842)     | 81,3750 (3,18443)        | ,350           |
| <b>2' Step</b>                    | 11,8567 (1,59458)      | 7,9538 (,43513)          | ,036*          |
